# Supplementary material for: Reduction-resistant and reduction-catalytic double-crown nickel nanoclusters
Source: Royal Society of Chemistry journal article supplement (doi:10.1039/c4nr04981k), 2014-01-01
Supplement: c4nr04981k1.pdf [file c4nr04981k1.pdf]

---

## Supporting information

# Reduction-Resistant and Reduction-Catalytic Double-Crown Nickel Nanoclusters

Min Zhu,<sup>‡a,c</sup> Shiming Zhou,<sup>‡b</sup> Chuanhao Yao,<sup>‡a</sup> Lingwen Liao,<sup>a</sup> Zhikun Wu<sup>\*a</sup>

<sup>a</sup> Key Laboratory of Materials Physics, Anhui Key Laboratory of Nanomaterials and Nanostructures, Institute of Solid State Physics, Chinese Academy of Sciences, Hefei, 230031 (P.R. China)

<sup>b</sup> Hefei National Laboratory for Physical Science at Microscale, University of Science and Technology of China, Hefei, 230026, China

<sup>c</sup> University of Science and Technology of China, Hefei, 230026, China

\*To whom correspondence should be addressed

Email: [zkwu@issp.ac.cn](mailto:zkwu@issp.ac.cn)

---

**Table of contents**

| <b>Title</b>                                                                                                                                                          | <b>Page No.</b> |
|-----------------------------------------------------------------------------------------------------------------------------------------------------------------------|-----------------|
| Experimental section                                                                                                                                                  | 3               |
| Table 1. Crystal data and structure refinement for Ni <sub>6</sub> (PET) <sub>12</sub> .                                                                              | 5               |
| Table 2. Atomic coordinates and equivalent isotropic displacement parameters for Ni <sub>6</sub> (PET) <sub>12</sub> .                                                | 6               |
| Table 3. Bond lengths for Ni <sub>6</sub> (PET) <sub>12</sub> .                                                                                                       | 8               |
| Table 4. Bond angles for Ni <sub>6</sub> (PET) <sub>12</sub> .                                                                                                        | 9               |
| Table 5. Anisotropic displacement parameters for Ni <sub>6</sub> (PET) <sub>12</sub> .                                                                                | 11              |
| Table 6. Hydrogen atom coordinates and isotropic displacement parameters for Ni <sub>6</sub> (PET) <sub>12</sub> .                                                    | 13              |
| Figure S1: MALDI-TOF-MS of M-SCH <sub>2</sub> CH <sub>2</sub> Ph complex.                                                                                             | 15              |
| Figure S2: UV-Vis spectra of Ni <sub>6</sub> (PET) <sub>12</sub> in CH <sub>2</sub> Cl <sub>2</sub> recorded at RT over seven days.                                   | 16              |
| Figure S3: Thermogravimetric analysis (N <sub>2</sub> atmosphere, 10 °C min <sup>-1</sup> ) of Au <sub>25</sub> (SCH <sub>2</sub> CH <sub>2</sub> Ph) <sub>18</sub> . | 16              |
| Figure S4: UV/Vis/NIR spectra monitoring the reduction of 4-nitrophenol to 4-aminophenol catalyzed by Ni <sub>6</sub> (PET) <sub>12</sub> at room temperature.        | 17              |

## EXPERIMENTAL SECTION

**Chemicals.** Bismuth nitrate pentahydrate ( $\text{Bi}(\text{NO}_3)_3 \cdot 5\text{H}_2\text{O}$ ,  $\geq 99\%$ , Shanghai Chemical Reagent Co., Ltd), tetraoctylammonium bromide (TOABr, 98%, Aladdin), 2-phenylethanethiol ( $\text{PhC}_2\text{H}_4\text{SH}$ ,  $\geq 99\%$ , Aldrich), etha-nethiol ( $\text{C}_2\text{H}_5\text{SH}$ ,  $\geq 98\%$ , Aladdin), 1-dodecanethiol ( $\text{C}_{12}\text{H}_{25}\text{SH}$ ,  $\geq 98\%$ , Shanghai Chemical Reagent Co., Ltd), 4-(tert-Butyl) benzene-1-thiol ( $\text{C}_{10}\text{H}_{12}\text{SH}$ , TBBT,  $\geq 99\%$ , Aladdin), 4-nitrophenol ( $\text{C}_6\text{H}_5\text{NO}_3$ , AR, Tianjin Guangfu Fine Chemical Research Institute), nickel (II) nitrate hexahydrate ( $\text{Ni}(\text{NO}_3)_2 \cdot 6\text{H}_2\text{O}$ ,  $\geq 98.0\%$ ), cobalt nitrate hexahydrate ( $\text{Co}(\text{NO}_3)_2 \cdot 6\text{H}_2\text{O}$ ,  $\geq 99\%$ ), ferrous sulfate septihydrate ( $\text{FeSO}_4 \cdot 7\text{H}_2\text{O}$ ,  $\geq 99\%$ ), palladium nitrate dehydrate ( $\text{Pd}(\text{NO}_3)_2 \cdot 2\text{H}_2\text{O}$ ,  $\geq 99\%$ ) were purchased from Sinopharm Chemical Reagent Co. Ltd., 1-hexanethiol ( $\text{C}_6\text{H}_{13}\text{SH}$ ,  $\geq 98\%$ ), sodium borohydride ( $\text{NaBH}_4$ ,  $\geq 96\%$ ), sodium hydroxide ( $\text{NaOH}$ ,  $\geq 96\%$ ), tetrahydrofuran ( $\text{C}_4\text{H}_8\text{O}$ ,  $\geq 99.9\%$ ), dichloromethane ( $\text{CH}_2\text{Cl}_2$ ,  $\geq 99.5\%$ ), ethanol ( $\text{EtOH}$ ,  $\geq 99.7\%$ ), and methanol ( $\text{CH}_3\text{OH}$ ,  $\geq 99.5\%$ ) were purchased from Sinopharm Chemical Reagent Co. Ltd.

All chemicals were used as received except THF, through which  $\text{N}_2$  (99.99% Nanjing Special Gas Corp.) was bubbled. The water used in all experiments was ultrapure (resistivity 18.2  $\text{M}\Omega$  cm), produced with a Milli-Q NANO pure water system.

**Synthesis of  $\text{Ni}_6(\text{SC}_2\text{H}_4\text{Ph})_{12}$ .** The synthesis of  $\text{Ni}_6$  follows a previous method used to synthesize  $\text{Au}_{25}$ .<sup>1,2</sup> In short,  $\text{Ni}(\text{NO}_3)_2 \cdot 6\text{H}_2\text{O}$  (0.1246 g, 0.42 mmol) was mixed with 2 equivalents of tetraoctylammonium bromide (TOABr (0.460 g, 0.84 mmol)) in THF (25 ml). Then, 6 equivalents of phenylethanethiol (0.340 ml, 2.54 mmol) were added to this solution and the solution was stirred for 3 hours. To this solution, 10 equivalents of  $\text{NaBH}_4$  (0.160 g, 4.23 mmol) in cold water (5 ml) was added all at once under vigorous stirring (a dark-brown solution) and the reaction was allowed to proceed under constant stirring for 20 h (the progress of the reaction was monitored by UV-Vis spectroscopy). THF was removed via rotary evaporation at 25 °C to isolate the crude product. For purification, the crude product was washed with methanol three times and extracted with  $\text{CH}_2\text{Cl}_2$  twice, during this procedure, traces of by-products, such as  $\text{TOA}^+$  and  $\text{NO}_3^-$  were removed thoroughly. Then the as-obtained products were crystallized from the mixture of 2 ml  $\text{CH}_2\text{Cl}_2$  and 2 ml ethanol. Crystals were separated and washed with ethanol for 3 times and dried under vacuum (yield: 30%). (All operations were performed under air atmosphere and at room temperature).

### Control experiments.

**Method I** (without NaOH or  $\text{NaBH}_4$ ):  $\text{Ni}(\text{NO}_3)_2 \cdot 6\text{H}_2\text{O}$  (0.1246 g, 0.42 mmol) and TOABr (0.460 g, 0.84 mmol) were first dissolved in THF (25 mL) to give a deep-blue solution, into which phenylethanethiol (0.340 mL, 2.54 mmol) was added, and the resulting mixture was stirred for an additional 3h. Then, THF was removed via rotary evaporation to isolate the crude product. The crude product was isolated and purified following the same procedure of  $\text{Ni}_6$ .

**Method II** (NaOH was used): The protocols are similar to the synthesis of  $\text{Ni}_6$  except that  $\text{NaBH}_4$  was replaced by NaOH.

**General procedure for the synthesis of other Metal- phenylethanethiol complex:** First, metal salts ( $\text{Co}(\text{NO}_3)_2 \cdot 6\text{H}_2\text{O}$ ,  $\text{Bi}(\text{NO}_3)_3 \cdot 5\text{H}_2\text{O}$ ,  $\text{FeSO}_4 \cdot 7\text{H}_2\text{O}$ ,  $\text{Pd}(\text{NO}_3)_2 \cdot 2\text{H}_2\text{O}$ ) (0.42 mmol) was mixed with 2 equivalents of TOABr (0.460 g, 0.84 mmol) in THF (25 ml) in a three-necked flask. After the resulting solution was cooled at ca. 0°C in an ice bath over a period of 30 min, phenylethane-thiol (340  $\mu\text{L}$ , 6 equivalents per mole of metal) (for  $\text{Pd}(\text{NO}_3)_2 \cdot 2\text{H}_2\text{O}$ , 1-dodecanethiol was used) was slowly added to the flask. Three hours later, an aqueous solution of  $\text{NaBH}_4$  (160 mg, 10.0 equivalents per mole of metal, freshly dissolved in 5 mL ice-cold nanopure water) was rapidly added all at once under vigorous stirring. The reaction was allowed to proceed under constant stirring for additional 0.5-2 hours. The crude product was collected (rotary evaporation was used to remove THF) and thoroughly washed with water and methanol, then dissolve in small amount of  $\text{CH}_2\text{Cl}_2$ . After the removal of some insoluble solid, an adequate amount of MeOH was added until a large amount of precipitate were formed. The

precipitates were collected and dried for the subsequent reduction-resistance test.

**General procedure for the synthesis of other thiolated Ni complexes:** Ni(NO<sub>3</sub>)<sub>2</sub>·6H<sub>2</sub>O (0.1246 g, 0.42 mmol) was added into a THF solution (25 mL) of TOABr (460.0 mg, 0.84 mmol). The resulting solution was cooled down to ca. 0 °C in an ice bath over a period of 30 min. Thiولات (4-(tert-butyl)benzene-1-thiol, tert-butyl thiol (TBBT), ethanethiol, 1-hexanethiol) (2.54 mmol, 6 equivalents per mole of nickel) was slowly added, and the solution was stirred for ca. 3h. A freshly made aqueous solution of NaBH<sub>4</sub> (160.0 mg, dissolved in 5 mL ice-cold H<sub>2</sub>O) was then added rapidly into the reaction mixture under vigorous stirring. The reaction was stopped after constant stirring for 1-2 hours. Then THF was removed by rotary evaporation to get the crude product. After washing with water and methanol for several times, the crude product was dissolved in small amount of CH<sub>2</sub>Cl<sub>2</sub>, into which an adequate amount of MeOH was added until a large amount of precipitate was formed. The precipitates were collected and dried for the subsequent reduction-resistance test.

**Reduction catalysis:** In a typical catalytic reaction, 13.92 mg of nitrophenol was dissolved in 25 mL mixture of THF/water (20/5 by volume). Then, Ni<sub>6</sub> (5.005 × 10<sup>-3</sup> mmol) were added, after stirring for several minutes, 40 equiv. of NaBH<sub>4</sub> in ice cold water was added. Immediately after the addition of NaBH<sub>4</sub>, UV/Vis/NIR spectra were recorded. The reaction was monitored by UV/Vis/NIR spectroscopy. Control experiments were carried out at the same conditions with or without Au<sub>25</sub>(SC<sub>2</sub>H<sub>4</sub>Ph)<sub>18</sub> and no nitrophenol reduction was observed.

**Reduction-resistance test:** The reduction-resistance property (RRP) of Ni<sub>6</sub> and other complexes towards NaBH<sub>4</sub> was studied with UV/Vis/NIR spectroscopy. In a typical procedure; to a solution of Ni<sub>6</sub> or other complexes, 0.1 mmol NaBH<sub>4</sub> was added in portions and three minutes after every addition of NaBH<sub>4</sub>, UV/Vis/NIR spectra were recorded.

**Electrochemistry.** A conventional three-electrode system was used for the experiment. A Pt disk electrode (0.5 mm diameter) was used as working electrode (WE). Before used, the WE was firstly polished on emery paper of decreasing grades then with Al<sub>2</sub>O<sub>3</sub> powders with size down to 0.05 μm and cleaned electrochemically by potential-cycling in 0.5 M H<sub>2</sub>SO<sub>4</sub> solution, the electrode was then rinsed thoroughly with ultrapure water (18.2 MΩ cm). An SCE (with saturated KCl solution) electrode and carbon rods are used as a reference (RE) and counter electrode (CE), respectively. The electrode potentials were controlled by a potentiostat (Zahner, Germer). Ni clusters dissolved in 0.1 M Bu<sub>4</sub>NPF<sub>6</sub> that was constantly purged by N<sub>2</sub> (99.99% Nanjing Special Gas Corp.) during the experiments. All electrochemical experiments were carried out at room temperature (ca. 25 °C).

**Characterization.** Transmission electron microscopy (TEM) images were taken by JEOL2010. The operating voltage on the microscope was 200 keV. Matrix-assisted laser desorption ionization mass spectrometry (MALDI-MS) was performed on an autoflex Speed TOF/TOF mass spectrometer (Bruker). Trans-2-[3-(4-tert-butylphenyl)-2-methyl-2-propenylidene] malononitrile (DCTB) was used as the matrix, and the molar ratio of clusters to matrix was 1:500. All UV/Vis/NIR absorption spectra were recorded using a UV-2550 spectrophotometer (Shimadzu, Japan) at room temperature. TGA was conducted in a N<sub>2</sub> atmosphere (flow rate ~50 mL/min, ~3 mg sample used) on a TG/DAT 6300 analyzer (Seiko Instruments, Inc), and the heating rate was 10 °C /min. XPS measurements were performed on an ESCALAB 250Xi XPS spectrometer (Thermo Scientific, America), using a monochromatized Al Kα source and equipped with an Ar<sup>+</sup> ion sputtering gun. All binding energies were calibrated using the C (1s) carbon peak (284.8 eV). The diffraction data of single crystal (0.36 X 0.32 X 0.25 mm) were collected on an Agilent Gemini S Ultra diffractometer using Cu Kα radiation and the crystal structure was solved by direct methods and refined by full-matrix least-squares methods with SHELXL-2013 program (Sheldrick, 2013).

- 1 M. Zhu, E. Lanni, N. Garg, M. E. Bier and R. Jin, *J. Am. Chem. Soc.*, 2008, **130**, 1138.
- 2 Z. Wu, J. Chen and R. Jin, *Adv. Fun. Mater.*, 2011, **21**, 177.

**Table 1. Crystal data and structure refinement for Ni<sub>6</sub>(PET)<sub>12</sub>.**

|                                             |                                                                  |
|---------------------------------------------|------------------------------------------------------------------|
| Identification code                         | Ni <sub>6</sub> (PET) <sub>12</sub>                              |
| Empirical formula                           | C <sub>96</sub> H <sub>108</sub> Ni <sub>6</sub> S <sub>12</sub> |
| Formula weight                              | 1998.80                                                          |
| Temperature/K                               | 291(2)                                                           |
| Crystal system                              | monoclinic                                                       |
| Space group                                 | P2 <sub>1</sub> /c                                               |
| a/Å                                         | 11.3662(2)                                                       |
| b/Å                                         | 12.5415(3)                                                       |
| c/Å                                         | 32.7762(8)                                                       |
| α/°                                         | 90                                                               |
| β/°                                         | 91.676(2)                                                        |
| γ/°                                         | 90                                                               |
| Volume/Å <sup>3</sup>                       | 4670.22(18)                                                      |
| Z                                           | 2                                                                |
| ρ <sub>calc</sub> /cm <sup>3</sup>          | 1.421                                                            |
| μ/mm <sup>-1</sup>                          | 4.150                                                            |
| F(000)                                      | 2088.0                                                           |
| Crystal size/mm <sup>3</sup>                | 0.36 × 0.32 × 0.25                                               |
| Radiation                                   | CuKα (λ = 1.54184)                                               |
| 2θ range for data collection/°              | 7.548 to 130.162                                                 |
| Index ranges                                | -13 ≤ h ≤ 8, -13 ≤ k ≤ 14, -38 ≤ l ≤ 38                          |
| Reflections collected                       | 18303                                                            |
| Independent reflections                     | 7239 [R <sub>int</sub> = 0.0559, R <sub>sigma</sub> = 0.0587]    |
| Data/restraints/parameters                  | 7239/31/514                                                      |
| Goodness-of-fit on F <sup>2</sup>           | 1.079                                                            |
| Final R indexes [I ≥ 2σ (I)]                | R <sub>1</sub> = 0.0922, wR <sub>2</sub> = 0.2378                |
| Final R indexes [all data]                  | R <sub>1</sub> = 0.1052, wR <sub>2</sub> = 0.2468                |
| Largest diff. peak/hole / e Å <sup>-3</sup> | 1.23/-0.68                                                       |

**Table 2. Fractional atomic coordinates ( $\times 10^4$ ) and equivalent isotropic displacement parameters ( $\text{\AA}^2 \times 10^3$ ) for  $\text{Ni}_6(\text{PET})_{12}$ .  $U_{\text{eq}}$  is defined as 1/3 of the trace of the orthogonalised  $U_{ij}$  tensor.**

| Atom | x           | y          | z         | U(eq)   |
|------|-------------|------------|-----------|---------|
| Ni2  | -443.6(11)  | 2114.6(11) | 52.7(4)   | 42.6(4) |
| Ni1  | 1620.1(11)  | 1611.2(10) | -267.2(4) | 40.6(4) |
| Ni3  | -2090.3(11) | 593.2(10)  | 325.0(4)  | 40.9(4) |
| S4   | 1567.5(17)  | 2367.6(16) | 313.9(6)  | 42.6(5) |
| S3   | -67.0(17)   | 2537.1(16) | -517.5(6) | 43.9(5) |
| S2   | 3349.6(16)  | 704.5(15)  | -44.3(6)  | 41.3(5) |
| S1   | 1420.2(17)  | 605.5(16)  | -809.5(6) | 41.8(5) |
| S5   | -2368.3(17) | 1604.2(16) | -216.1(6) | 44.1(5) |
| S6   | -908.7(18)  | 1928.2(16) | 625.6(6)  | 45.2(5) |
| C40  | -6173(8)    | 4019(7)    | -377(3)   | 72(3)   |
| C11  | 5286(7)     | 1736(7)    | 1111(3)   | 49(2)   |
| C39  | -6801(10)   | 4923(8)    | -487(4)   | 85(4)   |
| C16  | 6544(8)     | 1751(8)    | 1308(3)   | 59(2)   |
| C38  | -6682(10)   | 5590(9)    | -806(4)   | 94(4)   |
| C43  | 1070(8)     | 1160(8)    | 1820(3)   | 54(2)   |
| C37  | -5813(12)   | 5207(10)   | -1028(4)  | 123(6)  |
| C36  | -5180(12)   | 4312(10)   | -908(4)   | 108(5)  |
| C48  | 1191(10)    | 1626(10)   | 2191(3)   | 75(3)   |
| C35  | -5265(7)    | 3635(7)    | -585(3)   | 57(2)   |
| C42  | 41(8)       | 1480(8)    | 1447(3)   | 54(2)   |
| C18  | -2241(7)    | 2717(7)    | -1155(3)  | 57(2)   |
| C2   | 2347(8)     | 1961(8)    | -1282(3)  | 72(3)   |
| C27  | 1433(7)     | 4355(7)    | 942(3)    | 61(3)   |
| C4   | 1107(10)    | 1111(11)   | -1933(3)  | 87(4)   |
| C14  | 6176(11)    | 1886(12)   | 1959(3)   | 92(4)   |
| C6   | -689(14)    | 1828(15)   | -2311(5)  | 195(11) |
| C15  | 6989(10)    | 1815(11)   | 1726(3)   | 78(3)   |
| C3   | 1333(7)     | 1946(9)    | -1619(3)  | 71(3)   |
| C7   | -542(14)    | 2618(17)   | -2019(5)  | 191(10) |
| C34  | -4581(7)    | 2649(7)    | -464(3)   | 60(2)   |
| C26  | 1052(9)     | 4478(7)    | 481(3)    | 61(3)   |
| C12  | 4479(9)     | 1803(9)    | 1350(3)   | 67(3)   |
| C28  | 387(10)     | 4490(9)    | 1120(4)   | 84(4)   |
| C44  | 1952(9)     | 334(9)     | 1832(3)   | 75(3)   |
| C13  | 4930(10)    | 1883(11)   | 1763(3)   | 84(4)   |
| C45  | 2734(9)     | 46(10)     | 2150(3)   | 77(3)   |
| C5   | 216(12)     | 1103(14)   | -2236(4)  | 133(6)  |

---

|     |          |          |          |        |
|-----|----------|----------|----------|--------|
| C46 | 2867(11) | 483(11)  | 2528(4)  | 83(3)  |
| C29 | 706(16)  | 4455(12) | 1536(5)  | 107(5) |
| C30 | 1767(16) | 4258(12) | 1771(5)  | 118(6) |
| C32 | 2500(9)  | 4194(9)  | 1177(3)  | 78(3)  |
| C47 | 2068(12) | 1313(12) | 2541(3)  | 92(4)  |
| C8  | 374(10)  | 2586(13) | -1728(4) | 126(6) |
| C31 | 2847(14) | 4157(11) | 1604(5)  | 104(5) |
| C1  | 2676(8)  | 952(8)   | -1020(3) | 56(2)  |
| C41 | 411(7)   | 1530(7)  | 1053(2)  | 50(2)  |
| C25 | 1761(9)  | 3820(7)  | 264(3)   | 59(2)  |
| C9  | 3968(7)  | 674(7)   | 503(3)   | 48(2)  |
| C33 | -3298(7) | 2794(7)  | -200(3)  | 53(2)  |
| C10 | 4790(8)  | 1652(7)  | 653(3)   | 52(2)  |
| C17 | -1201(6) | 1963(7)  | -977(2)  | 48(2)  |
| C19 | -3326(6) | 2334(6)  | -1463(2) | 56(2)  |
| C20 | -3875(8) | 2759(10) | -1820(2) | 76(3)  |
| C21 | -4833(9) | 2492(10) | -2084(3) | 97(4)  |
| C22 | -5460(9) | 1557(10) | -2013(3) | 100(4) |
| C23 | -4941(8) | 1088(10) | -1664(3) | 79(3)  |
| C24 | -3970(7) | 1398(7)  | -1411(3) | 64(3)  |

**Table 3. Bond lengths for Ni<sub>6</sub>(PET)<sub>12</sub>.**

| Atom | Atom             | Length/Å   | Atom | Atom | Length/Å  |
|------|------------------|------------|------|------|-----------|
| Ni2  | Ni1              | 2.6727(16) | C36  | C35  | 1.363(8)  |
| Ni2  | Ni3              | 2.8352(17) | C48  | C47  | 1.548(17) |
| Ni2  | S4               | 2.438(2)   | C35  | C34  | 1.508(12) |
| Ni2  | S3               | 2.001(2)   | C42  | C41  | 1.370(11) |
| Ni2  | S5               | 2.421(3)   | C18  | C17  | 1.610(8)  |
| Ni2  | S6               | 1.979(2)   | C18  | C19  | 1.643(8)  |
| Ni1  | Ni3 <sup>1</sup> | 2.8233(18) | C2   | C3   | 1.572(9)  |
| Ni1  | S4               | 2.130(2)   | C2   | C1   | 1.567(13) |
| Ni1  | S3               | 2.368(2)   | C27  | C26  | 1.570(14) |
| Ni1  | S2               | 2.368(2)   | C27  | C28  | 1.350(8)  |
| Ni1  | S1               | 2.186(2)   | C27  | C32  | 1.431(9)  |
| Ni3  | Ni1 <sup>1</sup> | 2.8232(18) | C4   | C3   | 1.486(17) |
| Ni3  | S2 <sup>1</sup>  | 2.338(2)   | C4   | C5   | 1.398(5)  |
| Ni3  | S1 <sup>1</sup>  | 2.300(2)   | C14  | C15  | 1.219(15) |
| Ni3  | S5               | 2.196(2)   | C14  | C13  | 1.539(17) |
| Ni3  | S6               | 2.345(2)   | C6   | C7   | 1.386(5)  |
| S4   | C25              | 1.842(9)   | C6   | C5   | 1.390(5)  |
| S3   | C17              | 2.081(9)   | C3   | C8   | 1.393(5)  |
| S2   | Ni3 <sup>1</sup> | 2.338(2)   | C7   | C8   | 1.391(5)  |
| S2   | C9               | 1.908(9)   | C34  | C33  | 1.683(11) |
| S1   | Ni3 <sup>1</sup> | 2.300(2)   | C26  | C25  | 1.368(11) |
| S1   | C1               | 1.662(8)   | C12  | C13  | 1.436(15) |
| S5   | C33              | 1.830(8)   | C28  | C29  | 1.402(19) |
| S6   | C41              | 2.083(9)   | C44  | C45  | 1.396(5)  |
| C40  | C39              | 1.382(8)   | C45  | C46  | 1.359(16) |
| C40  | C35              | 1.342(6)   | C46  | C47  | 1.383(18) |
| C11  | C16              | 1.553(13)  | C29  | C30  | 1.43(2)   |
| C11  | C12              | 1.225(12)  | C30  | C31  | 1.364(9)  |
| C11  | C10              | 1.591(12)  | C32  | C31  | 1.445(17) |
| C39  | C38              | 1.350(9)   | C9   | C10  | 1.610(12) |
| C16  | C15              | 1.449(14)  | C19  | C20  | 1.413(5)  |
| C38  | C37              | 1.333(9)   | C19  | C24  | 1.397(5)  |
| C43  | C48              | 1.353(13)  | C20  | C21  | 1.410(5)  |
| C43  | C42              | 1.715(13)  | C21  | C22  | 1.395(5)  |
| C43  | C44              | 1.441(13)  | C22  | C23  | 1.403(5)  |
| C37  | C36              | 1.384(9)   | C23  | C24  | 1.415(5)  |

<sup>1</sup>-X,-Y,-Z



**Table 4. Bond angles for Ni<sub>6</sub>(PET)<sub>12</sub>.**

| Atom Atom Atom                       | Angle/°    | Atom Atom Atom | Angle/°   |
|--------------------------------------|------------|----------------|-----------|
| Ni1 Ni2 Ni3                          | 124.03(6)  | C41 S6 Ni3     | 120.2(3)  |
| S4 Ni2 Ni1                           | 49.00(6)   | C35 C40 C39    | 124.1(9)  |
| S4 Ni2 Ni3                           | 126.71(7)  | C16 C11 C10    | 133.7(7)  |
| S3 Ni2 Ni1                           | 58.80(7)   | C12 C11 C16    | 115.5(9)  |
| S3 Ni2 Ni3                           | 129.31(9)  | C12 C11 C10    | 110.9(9)  |
| S3 Ni2 S4                            | 93.99(9)   | C38 C39 C40    | 130.4(9)  |
| S3 Ni2 S5                            | 86.89(9)   | C15 C16 C11    | 133.4(8)  |
| S5 Ni2 Ni1                           | 126.08(7)  | C37 C38 C39    | 106.9(9)  |
| S5 Ni2 Ni3                           | 48.60(6)   | C48 C43 C42    | 126.1(9)  |
| S5 Ni2 S4                            | 172.02(9)  | C48 C43 C44    | 103.4(9)  |
| S6 Ni2 Ni1                           | 127.30(9)  | C44 C43 C42    | 130.5(8)  |
| S6 Ni2 Ni3                           | 54.88(7)   | C38 C37 C36    | 121.7(10) |
| S6 Ni2 S4                            | 87.48(9)   | C35 C36 C37    | 132.6(10) |
| S6 Ni2 S3                            | 171.00(11) | C43 C48 C47    | 127.1(11) |
| S6 Ni2 S5                            | 92.89(9)   | C40 C35 C36    | 104.2(8)  |
| Ni2 Ni1 Ni3 <sup>1</sup>             | 115.32(6)  | C40 C35 C34    | 123.9(8)  |
| S4 Ni1 Ni2                           | 59.75(7)   | C36 C35 C34    | 131.9(7)  |
| S4 Ni1 Ni3 <sup>1</sup>              | 120.43(8)  | C41 C42 C43    | 117.4(7)  |
| S4 Ni1 S3                            | 92.74(8)   | C17 C18 C19    | 125.6(7)  |
| S4 Ni1 S2                            | 89.01(9)   | C1 C2 C3       | 122.2(8)  |
| S4 Ni1 S1                            | 168.25(10) | C28 C27 C26    | 100.4(9)  |
| S3 Ni1 Ni2                           | 46.29(6)   | C28 C27 C32    | 122.0(11) |
| S3 Ni1 Ni3 <sup>1</sup>              | 127.59(8)  | C32 C27 C26    | 137.6(8)  |
| S3 Ni1 S2                            | 177.43(8)  | C5 C4 C3       | 127.2(13) |
| S2 Ni1 Ni2                           | 136.27(7)  | C15 C14 C13    | 116.2(11) |
| S2 Ni1 Ni3 <sup>1</sup>              | 52.65(6)   | C7 C6 C5       | 105.7(17) |
| S1 Ni1 Ni2                           | 112.56(8)  | C14 C15 C16    | 110.3(11) |
| S1 Ni1 Ni3 <sup>1</sup>              | 52.82(6)   | C4 C3 C2       | 127.1(9)  |
| S1 Ni1 S3                            | 86.41(9)   | C8 C3 C2       | 136.5(13) |
| S1 Ni1 S2                            | 92.26(8)   | C8 C3 C4       | 96.3(11)  |
| Ni1 <sup>1</sup> Ni3 Ni2             | 120.65(5)  | C6 C7 C8       | 121.8(18) |
| S2 <sup>1</sup> Ni3 Ni2              | 138.30(7)  | C35 C34 C33    | 118.7(7)  |
| S2 <sup>1</sup> Ni3 Ni1 <sup>1</sup> | 53.62(6)   | C25 C26 C27    | 107.0(8)  |
| S2 <sup>1</sup> Ni3 S6               | 177.06(9)  | C11 C12 C13    | 110.7(10) |
| S1 <sup>1</sup> Ni3 Ni2              | 116.67(8)  | C27 C28 C29    | 102.1(12) |
| S1 <sup>1</sup> Ni3 Ni1 <sup>1</sup> | 49.22(6)   | C45 C44 C43    | 129.4(10) |
| S1 <sup>1</sup> Ni3 S2 <sup>1</sup>  | 90.19(8)   | C12 C13 C14    | 133.9(9)  |
| S1 <sup>1</sup> Ni3 S6               | 90.15(9)   | C46 C45 C44    | 128.8(11) |

---

|                  |     |                  |           |     |     |     |           |
|------------------|-----|------------------|-----------|-----|-----|-----|-----------|
| S5               | Ni3 | Ni2              | 55.79(7)  | C6  | C5  | C4  | 129.7(16) |
| S5               | Ni3 | Ni1 <sup>1</sup> | 122.30(8) | C45 | C46 | C47 | 106.0(11) |
| S5               | Ni3 | S2 <sup>1</sup>  | 90.69(9)  | C28 | C29 | C30 | 135.8(12) |
| S5               | Ni3 | S1 <sup>1</sup>  | 166.42(9) | C31 | C30 | C29 | 123.6(14) |
| S5               | Ni3 | S6               | 89.66(9)  | C27 | C32 | C31 | 136.8(11) |
| S6               | Ni3 | Ni2              | 43.66(6)  | C46 | C47 | C48 | 125.3(10) |
| S6               | Ni3 | Ni1 <sup>1</sup> | 128.33(8) | C7  | C8  | C3  | 139.2(16) |
| Ni1              | S4  | Ni2              | 71.25(8)  | C30 | C31 | C32 | 99.3(12)  |
| C25              | S4  | Ni2              | 102.2(4)  | C2  | C1  | S1  | 104.2(6)  |
| C25              | S4  | Ni1              | 110.7(3)  | C42 | C41 | S6  | 114.2(6)  |
| Ni2              | S3  | Ni1              | 74.91(8)  | C26 | C25 | S4  | 118.4(7)  |
| Ni2              | S3  | C17              | 116.0(2)  | C10 | C9  | S2  | 117.7(6)  |
| C17              | S3  | Ni1              | 124.0(2)  | C34 | C33 | S5  | 112.9(6)  |
| Ni3 <sup>1</sup> | S2  | Ni1              | 73.72(8)  | C11 | C10 | C9  | 121.6(7)  |
| C9               | S2  | Ni1              | 125.4(3)  | C18 | C17 | S3  | 119.5(6)  |
| C9               | S2  | Ni3 <sup>1</sup> | 124.1(3)  | C20 | C19 | C18 | 134.7(8)  |
| Ni1              | S1  | Ni3 <sup>1</sup> | 77.96(8)  | C24 | C19 | C18 | 123.8(7)  |
| C1               | S1  | Ni1              | 96.7(4)   | C24 | C19 | C20 | 101.5(8)  |
| C1               | S1  | Ni3 <sup>1</sup> | 100.8(3)  | C21 | C20 | C19 | 137.0(11) |
| Ni3              | S5  | Ni2              | 75.61(8)  | C22 | C21 | C20 | 119.1(11) |
| C33              | S5  | Ni2              | 106.9(3)  | C21 | C22 | C23 | 106.4(10) |
| C33              | S5  | Ni3              | 121.1(3)  | C22 | C23 | C24 | 131.7(11) |
| Ni2              | S6  | Ni3              | 81.46(9)  | C19 | C24 | C23 | 124.1(9)  |
| Ni2              | S6  | C41              | 117.3(2)  |     |     |     |           |

<sup>1</sup>-X,-Y,-Z

**Table 5. Anisotropic displacement parameters ( $\text{\AA}^2 \times 10^3$ ) for  $\text{Ni}_6(\text{PET})_{12}$ . The anisotropic displacement factor exponent takes the form:  $-2\pi^2[\text{h}^2\text{a}^{*2}\text{U}_{11}+2\text{hka}^*\text{b}^*\text{U}_{12}+\dots]$ .**

| Atom | $\text{U}_{11}$ | $\text{U}_{22}$ | $\text{U}_{33}$ | $\text{U}_{23}$ | $\text{U}_{13}$ | $\text{U}_{12}$ |
|------|-----------------|-----------------|-----------------|-----------------|-----------------|-----------------|
| Ni2  | 40.3(7)         | 40.6(7)         | 48.1(8)         | 1.7(6)          | 24.7(6)         | 0.0(6)          |
| Ni1  | 39.6(7)         | 39.0(7)         | 44.5(7)         | 0.3(6)          | 21.7(6)         | 4.6(6)          |
| Ni3  | 39.6(7)         | 37.9(7)         | 46.5(8)         | 1.4(6)          | 22.3(6)         | 1.1(6)          |
| S4   | 39.9(10)        | 42.2(11)        | 46.8(11)        | -1.7(8)         | 18.8(8)         | 1.3(8)          |
| S3   | 42.0(11)        | 41.0(11)        | 49.8(11)        | 1.9(8)          | 18.6(9)         | 5.9(9)          |
| S2   | 37.1(10)        | 38.6(10)        | 49.0(11)        | 1.8(8)          | 15.2(8)         | 0.6(8)          |
| S1   | 40.8(10)        | 40.6(10)        | 44.7(10)        | 0.7(8)          | 15.6(8)         | 1.7(8)          |
| S5   | 44.4(11)        | 41.8(11)        | 47.1(11)        | 2.5(8)          | 17.0(9)         | 0.3(9)          |
| S6   | 43.9(11)        | 43.7(11)        | 49.2(11)        | -1.9(9)         | 21.2(9)         | -5.1(9)         |
| C40  | 70(6)           | 59(6)           | 90(7)           | 14(5)           | 52(6)           | 9(5)            |
| C11  | 50(5)           | 38(4)           | 59(5)           | -4(4)           | 21(4)           | -1(4)           |
| C39  | 81(7)           | 55(6)           | 122(10)         | 9(6)            | 54(7)           | 23(6)           |
| C16  | 51(5)           | 71(6)           | 56(5)           | -12(5)          | 15(4)           | 0(5)            |
| C38  | 78(8)           | 64(7)           | 143(12)         | 22(7)           | 55(8)           | 27(6)           |
| C43  | 55(5)           | 57(5)           | 50(5)           | -3(4)           | 25(4)           | -7(4)           |
| C37  | 133(12)         | 98(10)          | 144(13)         | 64(10)          | 93(11)          | 44(9)           |
| C36  | 104(10)         | 102(10)         | 120(11)         | 49(8)           | 70(8)           | 56(8)           |
| C48  | 85(7)           | 80(8)           | 62(6)           | -16(5)          | 27(6)           | 5(6)            |
| C35  | 43(5)           | 57(6)           | 74(6)           | 5(5)            | 26(4)           | 3(4)            |
| C42  | 58(5)           | 52(5)           | 54(5)           | -6(4)           | 28(4)           | -4(4)           |
| C18  | 60(6)           | 47(5)           | 64(6)           | 10(4)           | 23(5)           | 10(4)           |
| C2   | 84(7)           | 57(6)           | 78(7)           | 11(5)           | 53(6)           | 0(5)            |
| C27  | 75(7)           | 36(5)           | 72(6)           | -8(4)           | 25(5)           | 0(5)            |
| C4   | 88(8)           | 98(10)          | 75(8)           | 27(7)           | 25(7)           | -11(7)          |
| C14  | 94(9)           | 129(12)         | 54(6)           | -18(7)          | 18(6)           | -6(8)           |
| C6   | 79(10)          | 360(30)         | 148(15)         | 188(15)         | -19(11)         | -66(13)         |
| C15  | 63(6)           | 107(10)         | 65(7)           | -12(6)          | 12(5)           | 0(6)            |
| C3   | 59(6)           | 82(8)           | 74(7)           | 37(6)           | 33(5)           | 3(6)            |
| C7   | 91(12)          | 270(20)         | 220(20)         | 168(16)         | 65(10)          | 67(16)          |
| C34  | 53(5)           | 44(5)           | 84(7)           | 4(5)            | 28(5)           | -1(4)           |
| C26  | 70(6)           | 33(4)           | 82(7)           | -7(4)           | 28(5)           | 6(4)            |
| C12  | 58(6)           | 84(8)           | 61(6)           | -11(5)          | 24(5)           | 10(5)           |
| C28  | 87(8)           | 74(8)           | 92(9)           | -5(6)           | 46(7)           | 0(6)            |
| C44  | 90(8)           | 77(7)           | 60(6)           | -3(5)           | 38(6)           | 10(6)           |
| C13  | 80(8)           | 109(10)         | 66(7)           | -20(6)          | 37(6)           | 1(7)            |
| C45  | 79(7)           | 94(9)           | 60(6)           | 12(6)           | 28(6)           | 17(6)           |
| C5   | 153(14)         | 169(17)         | 77(9)           | 51(10)          | -1(10)          | -75(12)         |

---

|     |         |         |         |        |        |        |
|-----|---------|---------|---------|--------|--------|--------|
| C46 | 74(7)   | 103(10) | 74(8)   | 12(7)  | 8(6)   | 5(7)   |
| C29 | 138(13) | 100(11) | 88(10)  | -1(8)  | 62(9)  | 4(10)  |
| C30 | 197(19) | 83(10)  | 78(9)   | 1(7)   | 52(11) | 12(11) |
| C32 | 89(8)   | 66(7)   | 80(8)   | -8(6)  | 19(6)  | 16(6)  |
| C47 | 112(10) | 109(10) | 55(6)   | -22(7) | 25(7)  | -8(9)  |
| C8  | 117(11) | 136(13) | 129(11) | 64(9)  | 81(8)  | 45(10) |
| C31 | 128(12) | 85(10)  | 99(10)  | -12(8) | 0(9)   | 26(9)  |
| C1  | 50(5)   | 66(6)   | 53(5)   | 4(4)   | 25(4)  | 5(4)   |
| C41 | 47(5)   | 55(5)   | 49(5)   | -3(4)  | 26(4)  | -7(4)  |
| C25 | 72(6)   | 39(5)   | 69(6)   | -6(4)  | 36(5)  | -7(4)  |
| C9  | 46(5)   | 37(4)   | 61(5)   | 4(4)   | 17(4)  | -1(4)  |
| C33 | 56(5)   | 40(5)   | 63(5)   | 3(4)   | 31(4)  | 7(4)   |
| C10 | 53(5)   | 46(5)   | 57(5)   | 3(4)   | 19(4)  | -6(4)  |
| C17 | 43(4)   | 47(5)   | 55(5)   | -1(4)  | 21(4)  | 4(4)   |
| C19 | 50(5)   | 67(6)   | 54(5)   | 2(4)   | 24(4)  | 15(5)  |
| C20 | 64(6)   | 113(10) | 51(6)   | 15(6)  | 14(5)  | 25(6)  |
| C21 | 92(9)   | 140(11) | 60(7)   | 25(8)  | 25(7)  | 38(7)  |
| C22 | 55(7)   | 157(12) | 88(9)   | -38(9) | 10(6)  | 9(7)   |
| C23 | 58(6)   | 110(10) | 70(7)   | -9(7)  | 18(6)  | 1(6)   |
| C24 | 57(6)   | 75(7)   | 61(6)   | 2(5)   | 24(5)  | 12(5)  |

**Table 6. Hydrogen atom coordinates ( $\text{\AA}\times 10^4$ ) and isotropic displacement parameters ( $\text{\AA}^2\times 10^3$ ) for  $\text{Ni}_6(\text{PET})_{12}$ .**

| Atom | x     | y    | z     | U(eq) |
|------|-------|------|-------|-------|
| H40  | -6392 | 3653 | -145  | 87    |
| H39  | -7402 | 5100 | -313  | 102   |
| H16  | 7136  | 1711 | 1119  | 71    |
| H38  | -7123 | 6201 | -861  | 113   |
| H37  | -5628 | 5550 | -1269 | 148   |
| H36  | -4577 | 4139 | -1083 | 129   |
| H48  | 692   | 2196 | 2241  | 90    |
| H42A | -589  | 960  | 1456  | 65    |
| H42B | -293  | 2167 | 1514  | 65    |
| H18A | -1856 | 3299 | -1293 | 68    |
| H18B | -2608 | 3027 | -920  | 68    |
| H2A  | 3058  | 2180 | -1416 | 86    |
| H2B  | 2159  | 2524 | -1092 | 86    |
| H4   | 1614  | 529  | -1927 | 104   |
| H14  | 6301  | 1940 | 2240  | 110   |
| H6   | -1273 | 1791 | -2516 | 234   |
| H15  | 7781  | 1803 | 1806  | 94    |
| H7   | -1069 | 3184 | -2016 | 229   |
| H34A | -4420 | 2258 | -712  | 72    |
| H34B | -5089 | 2205 | -303  | 72    |
| H26A | 233   | 4276 | 439   | 73    |
| H26B | 1145  | 5211 | 393   | 73    |
| H12  | 3684  | 1803 | 1274  | 81    |
| H28  | -355  | 4581 | 997   | 100   |
| H44  | 2010  | -65  | 1595  | 90    |
| H13  | 4341  | 1946 | 1952  | 101   |
| H45  | 3231  | -522 | 2096  | 93    |
| H5   | 231   | 526  | -2414 | 160   |
| H46  | 3389  | 268  | 2736  | 100   |
| H29  | 71    | 4595 | 1701  | 129   |
| H30  | 1717  | 4195 | 2053  | 142   |
| H32  | 3137  | 4084 | 1011  | 93    |
| H47  | 2056  | 1716 | 2779  | 110   |
| H8   | 333   | 3169 | -1553 | 151   |
| H31  | 3588  | 4085 | 1729  | 125   |
| H1A  | 3272  | 1122 | -813  | 67    |
| H1B  | 2965  | 384  | -1191 | 67    |

---

|      |       |      |       |     |
|------|-------|------|-------|-----|
| H41A | 737   | 843  | 980   | 60  |
| H41B | 1037  | 2053 | 1039  | 60  |
| H25A | 2571  | 3986 | 341   | 71  |
| H25B | 1654  | 3999 | -23   | 71  |
| H9A  | 3310  | 631  | 684   | 57  |
| H9B  | 4419  | 22   | 538   | 57  |
| H33A | -3462 | 2956 | 82    | 63  |
| H33B | -2872 | 3393 | -311  | 63  |
| H10A | 5465  | 1661 | 478   | 62  |
| H10B | 4352  | 2301 | 596   | 62  |
| H17A | -723  | 1756 | -1204 | 57  |
| H17B | -1562 | 1319 | -875  | 57  |
| H20  | -3507 | 3381 | -1903 | 91  |
| H21  | -5043 | 2933 | -2302 | 116 |
| H22  | -6097 | 1296 | -2167 | 120 |
| H23  | -5300 | 459  | -1583 | 95  |
| H24  | -3747 | 950  | -1196 | 77  |

## Supporting figures

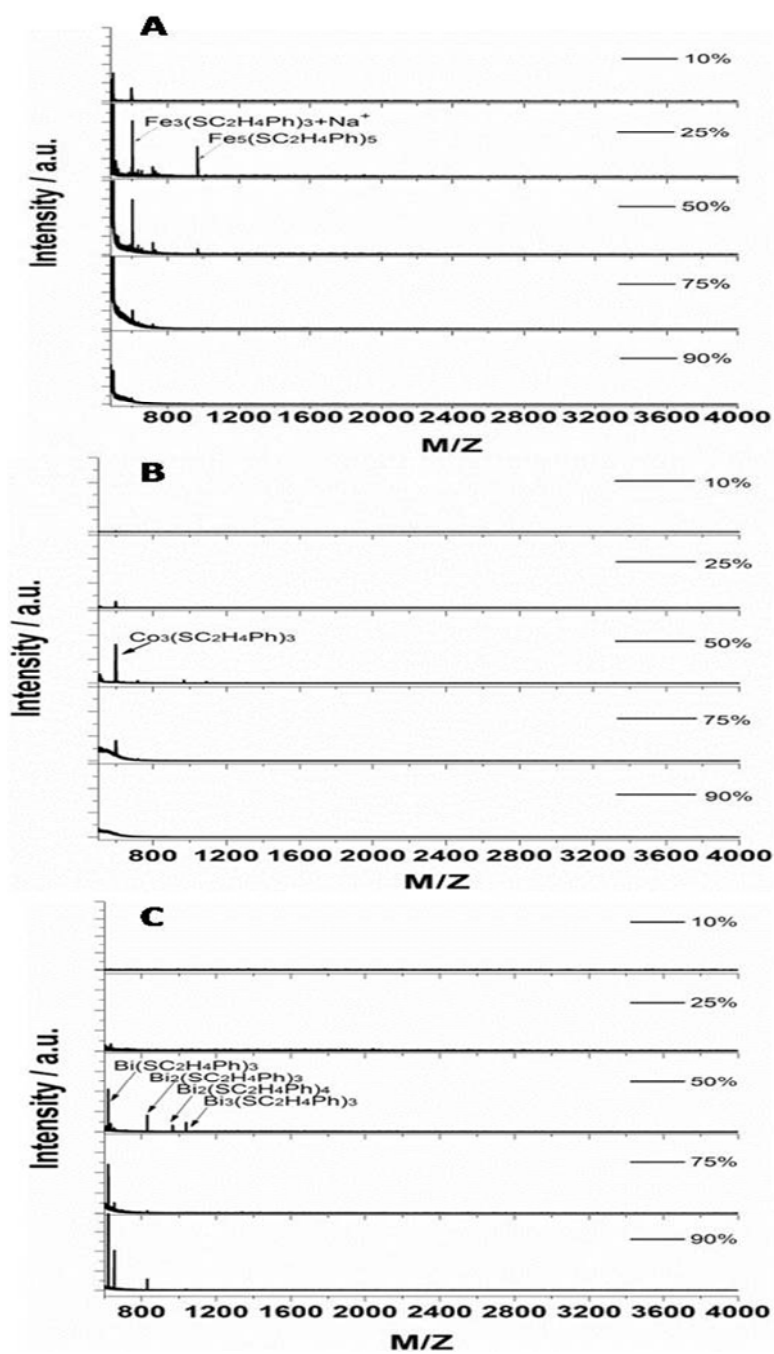

Figure.S1 MALDI-TOF-MS of M-SCH<sub>2</sub>CH<sub>2</sub>Ph complex (acquired in various laser intensity). (A) M:Fe; (B) M:Co; (C) M:Bi.

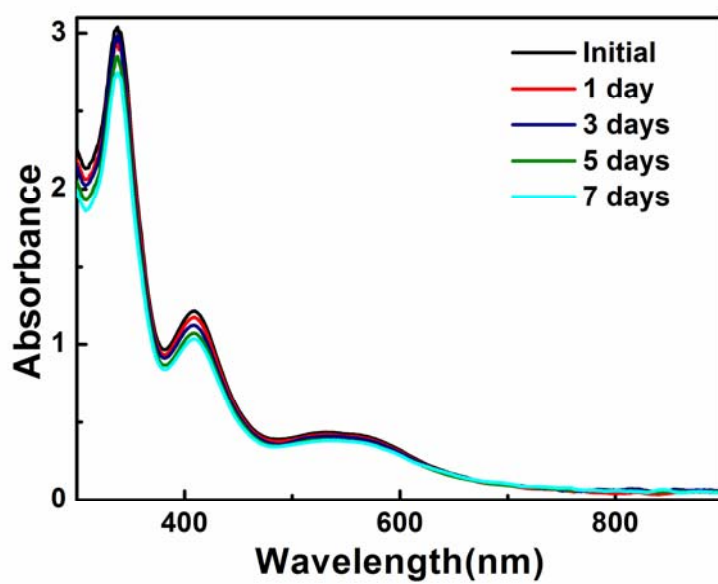

Figure.S2. UV-Vis spectra of  $\text{Ni}_6(\text{PET})_{12}$  in  $\text{CH}_2\text{Cl}_2$  recorded at RT over seven days.

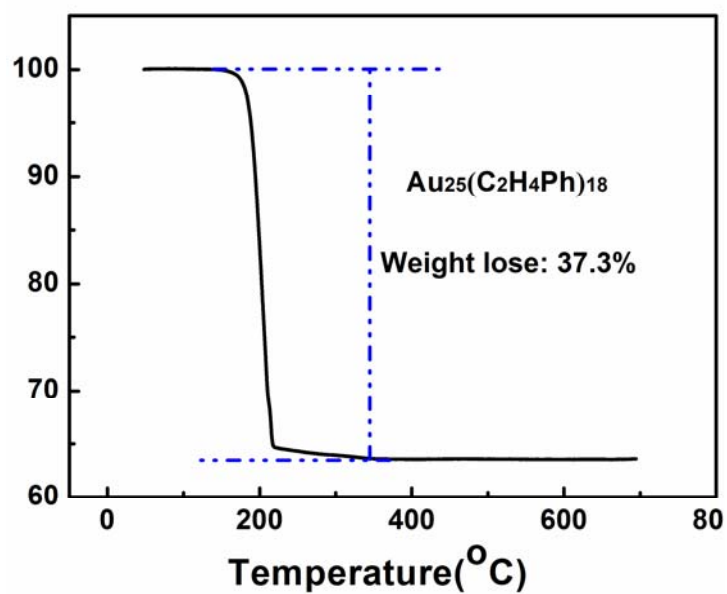

Figure.S3 Thermogravimetric analysis ( $\text{N}_2$  atmosphere,  $10\text{ }^{\circ}\text{C min}^{-1}$ ) of  $\text{Au}_{25}(\text{SCH}_2\text{CH}_2\text{Ph})_{18}$ .



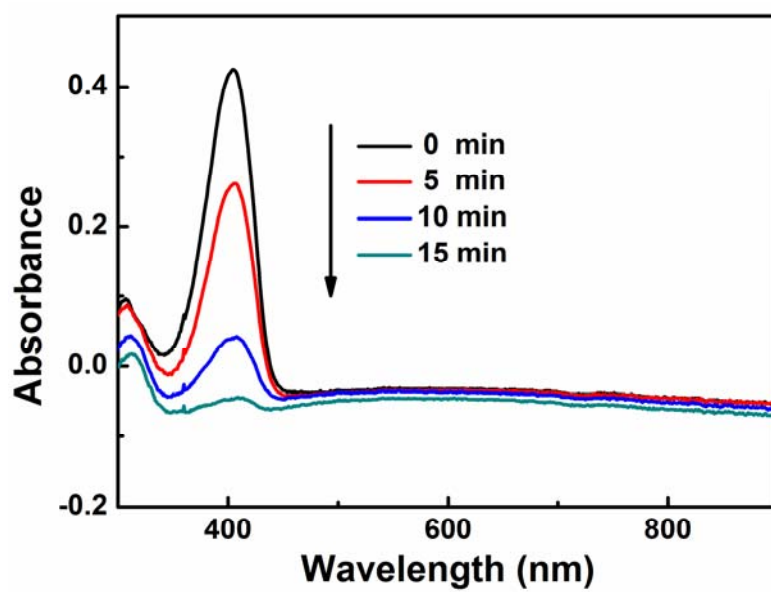

Figure.S4 UV/Vis/NIR spectra monitoring the reduction of 4-nitrophenol to 4-aminophenol catalyzed by  $\text{Ni}_6(\text{PET})_{12}$  at room temperature.
